# Supplementary material
Source: Elsevier journal article supplement (https://www.sciencedirect.com/science/article/pii/S2173510717300162)
Supplement: mmc1 [file S2173510717300162:mmc1.doc]

| TIPO DE MALFORMACIÓN | CAUSA | HALLAZGOS PRINCIPALES | IMPLANTE COCLEAR |
| --- | --- | --- | --- |
| **Aplasia laberíntica completa** | Detención del desarrollo antes de la 3ª semana de gestación. | Ausencia completa de las estructuras del oído interno. | Contraindicado |
| **Aplasia coclear** | Detención del desarrollo al final de la 3ª semana de gestación. | Cóclea: ausente.  Vestíbulo: normal o displásico | Contraindicado |
| **Cavidad común** | Detención del desarrollo en la 4ª semana de gestación. | Confluencia de cóclea y vestíbulo en una cavidad quística única. | Posible |
| **Partición incompleta tipo I** | Detención del desarrollo durante la 5ª semana de gestación. | Cóclea: aspecto quístico por ausencia completa de modiolo y tabique interescalar.  Vestíbulo: frecuentemente displásico, dilatado. | Posible |
| **Partición incompleta tipo II** | Detención del desarrollo en la 7ª semana de gestación. | Cóclea: espira basal normal, fusión de espiras media y apical por defecto de la porción superior del modiolo y el tabique interescalar.  Vestíbulo: con frecuencia mínimente dilatado.  Se asocia con frecuencia a un ensanchamiento del acueducto vestibular por dilatación del ducto y saco endolinfático. | Posible |
| **Partición incompleta tipo III** | Enfermedad genética recesiva ligada al cromosoma X. | Cóclea: rotada posteriormente, con modiolo ausente pero tabique interescalar presente.  Vestíbulo: habitualmente normal. | Posible |
| **Hipoplasia coclear** | Detención del desarrollo durante la 6ª semana de gestación | Tipo I: la cóclea es una pequeña excrecencia que surge del vestíbulo.  Tipo II: la cóclea es pequeña, sin modiolo ni tabique interescalar.  Tipo III: la cóclea presenta menos de 2 vueltas, el modiolo es más pequeño y el tabique interescalar más corto | Posible |
| **Síndrome del acueducto vestibular dilatado** | Etiología controvertida, probablemente malformación postnata. | Ensanchamiento del acueducto vestibular en TC, dilatación de ducto y saco endolinfático en RM.  Sin otras malformaciones asociadas. | No relevante.  Ver si existe malformación coclear asociada. |
| **Malformaciones vestibulares** | Detención del desarrollo entre la 6ª y la 22ª semana de gestación. | Cóclea: ver si asocia malformación.  Vestíbulo y canales semicirculares: displásicos. | No relevante.  Ver si existe malformación coclear asociada. |
